# Supplementary material
Source: PubMed Central journal article supplement (PMC2659397)
Supplement: NIHMS94246-supplement-01.pdf [file NIHMS94246-supplement-01.pdf]

**Molecular Cell, Volume 33**

**Supplemental Data**

**Cotranscriptional Recruitment of the mRNA**

**Export Factor Yra1 by Direct Interaction**

**with the 3' End Processing Factor Pcf11**

**Sara Ann Johnson, Gabrielle Cubberley, and David L. Bentley**

**Table S1.** Yeast strains used in this study

| Strain  | Genotype                                                                     | Reference             |
|---------|------------------------------------------------------------------------------|-----------------------|
| DLY23   | W303 MATa <i>sub2::HIS3</i> pCM188-SUB2 (URA3)                               | (Libri et al., 2001)  |
| DLY33-1 | W303 MATa <i>sub2::HIS3</i> pCM185-sub2-201 (TRP1)                           | (Libri et al., 2001)  |
| DLY33-6 | W303 MATa <i>sub2::HIS3</i> pCM185-sub2-206 (TRP1)                           | (Libri et al., 2001)  |
| W303-1B | MATa <i>ura3-1 trp1-1 ade2-1 leu2-3,112 his3-11,15</i>                       | (Amrani et al., 1997) |
| rna14-1 | W303-1B <i>rna14-1</i>                                                       | (Amrani et al., 1997) |
| DBY568  | W303-1B <i>rna14-1 rrp6::hygro<sup>r</sup></i>                               | This study            |
| rna15-2 | W303-1B <i>rna15-2</i>                                                       | (Amrani et al., 1997) |
| DBY569  | W303-1B <i>rna15-2 rrp6::hygro<sup>r</sup></i>                               | This study            |
| NA65    | W303-1B <i>pcf11-2</i>                                                       | (Amrani et al., 1997) |
| NA67    | W303-1B <i>pcf11-9</i>                                                       | (Amrani et al., 1997) |
| DBY979  | BY4741 <i>hygro<sup>r</sup>GAL1::YLR454W</i>                                 | This study            |
| DBY980  | BY4741 <i>hygro<sup>r</sup>GAL1::YLR454W::S.c. URA3</i>                      | This study            |
| DBY981  | BY4741 <i>hygro<sup>r</sup>GAL1::YLR454W::6XBoxB</i>                         | This study            |
| DBY986  | BY4741 <i>hygro<sup>r</sup>GAL1::YLR454W::6XBoxB Pcf11::HA-NPeptide HIS3</i> | This study            |
| DBY987  | BY4741 <i>hygro<sup>r</sup>GAL1::YLR454W::6XBoxB Pcf11::HA HIS3</i>          | This study            |
| DBY361  | W303-1B <i>Yral::GFPkan<sup>r</sup></i>                                      | This study            |

## Supplemental Experimental Procedures

To insert Box B sites into chromosomal *GALI-YLR454W* we used a URA3 pop-in pop-out strategy. URA3 was cloned into a fragment of YLR454W (721-1671) at the BamHI site (position 1242) in pBS (YLR454W-URA3). The excised insert was transformed into DBY979, and correct integration into the *GALI-YLR454W* locus was confirmed in DBY980 by colony PCR. Six copies of BoxB (Wiegand et al., 2003) were cloned into the YLR454W BamHI site at +1242 in pBS (YLR454W-6XBoxB), and used to replace URA3. Integrants were selected on FOA plates, and confirmed by PCR (DBY981). Endogenous Pcf11 was tagged at its C-terminus with a 6XHA tag (non-tethered control, DBY987) or 6XHA plus the Box B binding peptide of the P22 N-protein (NAKTRRHERRRKLAIERDTI) (tethered, DBY986) (Wiegand et al., 2003). Tagging was by transformation with PCR products made using pYM15 or pYM15-N peptide templates. *RRP6* was

replaced by *hygro<sup>r</sup>* in DBY568, 569 by PCR mediated gene replacement and confirmed by colony PCR.

**Table S2.** Plasmids used in this study

| Name                    | Description                                                                                                                                                      | Reference              |
|-------------------------|------------------------------------------------------------------------------------------------------------------------------------------------------------------|------------------------|
| pGEX-Yra1               | described previously                                                                                                                                             | (Stutz et al., 2000)   |
| pGEX-KG-Aly             |                                                                                                                                                                  | R. Zhao                |
| pET21b Rna14            | described previously                                                                                                                                             | (Kessler et al., 1996) |
| pET22-Rna15             |                                                                                                                                                                  | M. Minet               |
| pCMV/N                  | described previously                                                                                                                                             | (Wiegand et al., 2003) |
| pCMV/CAT/B              | described previously                                                                                                                                             | (Wiegand et al., 2003) |
| pYM15                   | 6X HA, HIS3MX6                                                                                                                                                   | (Janke et al., 2004)   |
| YM15-Npeptide           | N-peptide sequence was amplified from pCMV/N and inserted downstream of 6X HA at HindIII-Sall in pYM15                                                           | This study             |
| pBS-YLR454W             | fragment of YLR454W +721-1671 relative to ATG) was PCR amplified and inserted in pBlueScript KS- HindIII-SpeI                                                    | This study             |
| pBS-YLR454W-URA3        | <i>S.c.</i> URA3 was inserted into pBS-YLR454W at a unique BamHI site within the YLR454W fragment                                                                | This study             |
| pBS-YLR454W-BoxB        | 6X BoxB sequence was PCR amplified from pCMV/CAT/B and inserted into pBS-YLR454W at the BamHI site at +1242                                                      | This study             |
| pET21-Pcf11             | PCR amplified full length ORF inserted into pET21a                                                                                                               | This study             |
|                         | NheI-SacI                                                                                                                                                        |                        |
| pET21-Pcf11 CID         | aa's 1-140 were PCR amplified and inserted into pET21a                                                                                                           | This study             |
|                         | NheI-SacI                                                                                                                                                        |                        |
| pET21-Pcf11 ΔCID        | aa's 141- 626 were PCR amplified and inserted into pET21a                                                                                                        | This study             |
|                         | NheI-SacI                                                                                                                                                        |                        |
| pET21-Pcf11 420-608     | aa's 420-608 were PCR amplified and inserted into pET21b                                                                                                         | This study             |
|                         | NheI-XhoI                                                                                                                                                        |                        |
|                         | in-frame with the 6XHis tag                                                                                                                                      |                        |
| pET21-HuPcf11 1342-1487 | aa's 1342-1487 were PCR amplified and inserted into pET21b                                                                                                       | This study             |
|                         | NheI-XhoI                                                                                                                                                        |                        |
|                         | in-frame with the 6XHis tag                                                                                                                                      |                        |
| pET21GST-Yra1 RRM       | aa's 77-167 were PCR amplified and inserted into pET21GST-TEV                                                                                                    | This study             |
|                         | BamHI-EcoRI                                                                                                                                                      |                        |
| pET21GST-Yra1 N + RRM   | aa's 1-167 were PCR amplified and inserted into pET21GST-TEV                                                                                                     | This study             |
|                         | BamHI-EcoRI                                                                                                                                                      |                        |
| pET21GST-Yra1 RRM + C   | aa's 77-226 were PCR amplified and inserted into pET21GST-TEV                                                                                                    | This study             |
|                         | BamHI-XhoI                                                                                                                                                       |                        |
| pET21GST-Yra1 N         | aa's 1-66 were PCR amplified and inserted into pET21GST-TEV                                                                                                      | This study             |
|                         | BamHI-XhoI                                                                                                                                                       |                        |
| pET21GST-Yra1 C         | aa's 124-226 were PCR amplified and inserted into pET21GST-TEV                                                                                                   | This study             |
|                         | BamHI-XhoI                                                                                                                                                       |                        |
| pET21GST-Yra1N/C REF    | aa's 12-210 were replaced with a KpnI site by PCR and a fragment encoding the flexible linker region (residues 92-132) of λ repressor was inserted at that site. | This study             |

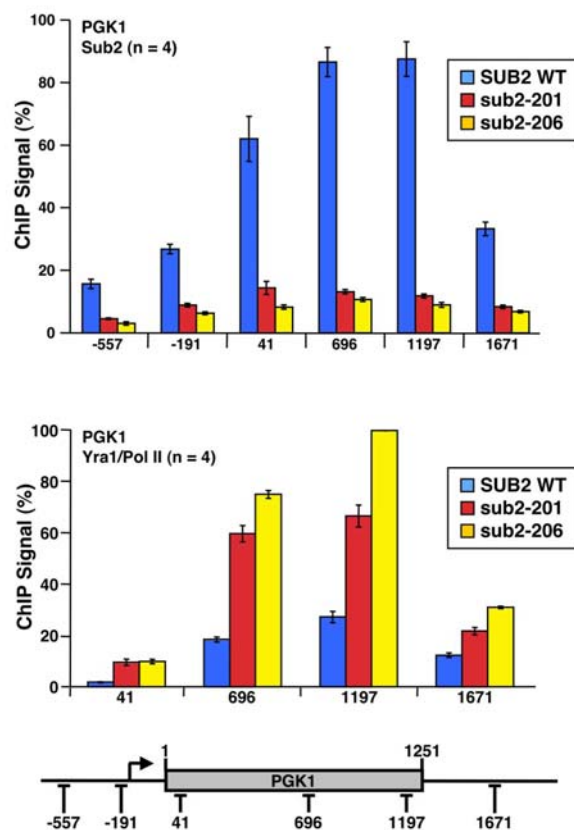**Figure S1. Yra1 recruitment to actively transcribed genes is independent of Sub2.**

ChIP analysis of *PGK1* as in (Fig. 1C, D) analyzed by real-time PCR with amplicons shown in the map. Relative ChIP signals are plotted for Sub2 (top) or as the ratios of Yra1:pol II (bottom). Note, Sub2 inactivation enhances recruitment of Yra1. Mean values, normalized to the maximal signal in each data set, +/- SEM are shown.

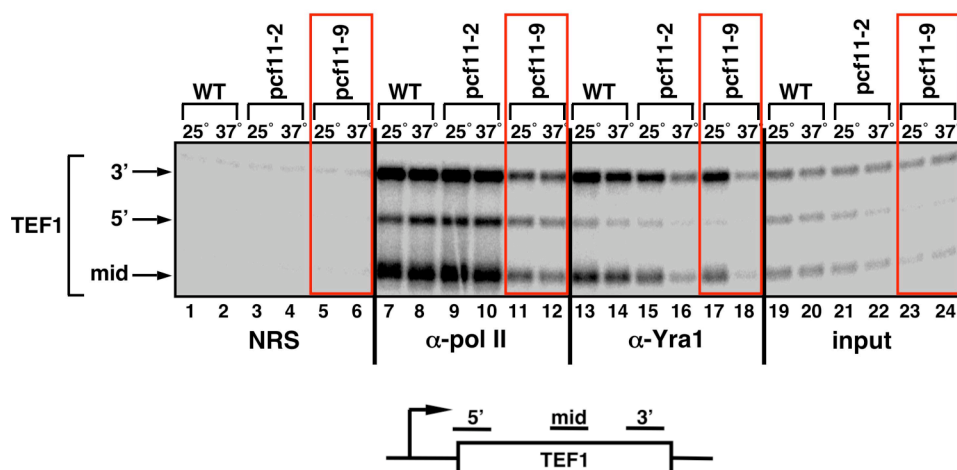

**Figure S2. Co-transcriptional Recruitment of Yra1 Requires Functional Pcf11.** ChIP analysis of WT, *pcf11-2*, and *pcf11-9* (marked by red boxes) cells at 25°C and 37°C (60 minutes) with anti-pol II, anti-Yra1 and normal rabbit serum (NRS) control as in Fig. 3A. Note *pcf11-9*, unlike *pcf11-2*, has a point mutation in the CID that prevents binding to the pol II CTD (Sadowski et al. 2003). <sup>32</sup>P-labeled PCR products correspond to the indicated amplicons of *TEF1* (see map). Upon normalization to pol II, quantification of Yra1 occupancy in the *pcf11-9* samples reveal TEF1-5' decreased 1.2 fold, TEF1-mid decreased 4.1 fold, and TEF1-3' decreased 6.0 fold; and for *pcf11-2* TEF1-5' decreased 1.7 fold, TEF1-mid decreased 2.1 fold, and TEF1-3' decreased 1.9 fold. Controls for Yra1 protein expression levels in *pcf11* mutants are shown in Fig. 2B.

Fig. S3

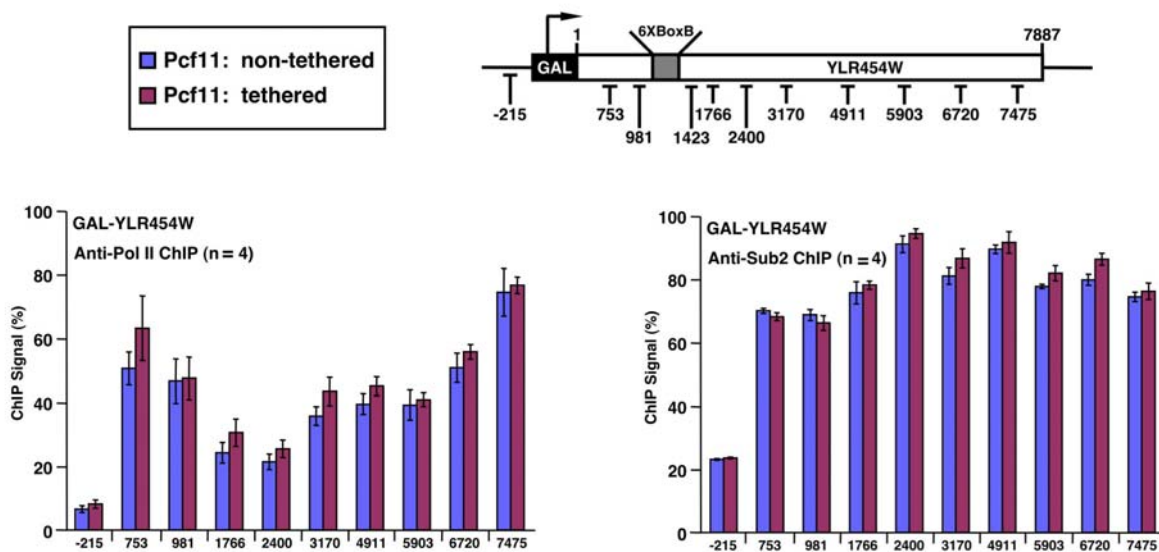

**Figure S3. RNA tethering of Pcf11 does not significantly alter pol II or Sub2 recruitment to the chromosomal *GAL-YLR454W* gene.** Anti-pol II (left) and anti-Sub2 (right) ChIP signals analyzed by real-time PCR for strains with tethered (purple bars) and non-tethered (blue bars) Pcf11. The same cross-linked extracts were used as in Fig. 6C. Diagram of *GAL-YLR454W-6XBoxB* and the corresponding amplicons are included above the plot. Data are represented as mean values, normalized to the maximal signal in the data set, +/- SEM.

Fig. S4

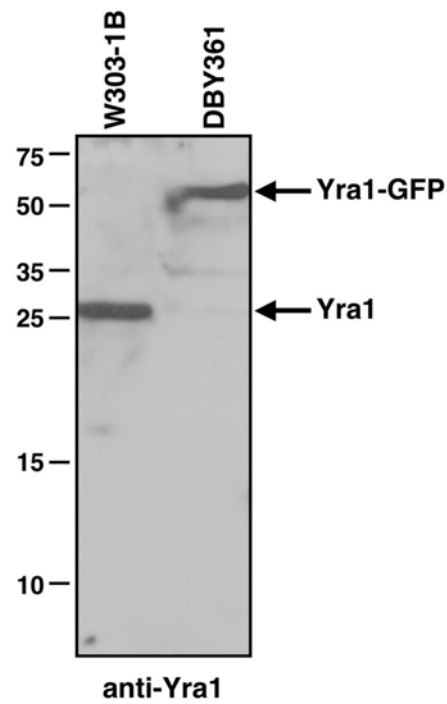

**Figure S4. Rabbit polyclonal anti-Yra1 (124-226) antibody specifically recognizes endogenous yeast Yra1.** Anti-Yra1 immunoblot of WT (W3031B) cells and cells in which endogenous Yra1 has been C-terminally tagged with GFP (DBY361). Addition of GFP increases the relative molecular weight of Yra1 by approximately 26 kD. Each lane loaded with 10ug of whole cell extract.



## Supplemental References

Amrani, N., Minet, M., Wyers, F., Dufour, M.E., Aggerbeck, L.P., and Lacroute, F. (1997). PCF11 encodes a third protein component of yeast cleavage and polyadenylation factor I. *Mol Cell Biol* *17*, 1102-1109.

Janke, C., Magiera, M.M., Rathfelder, N., Taxis, C., Reber, S., Maekawa, H., Moreno-Borchart, A., Doenges, G., Schwob, E., Schiebel, E., and Knop, M. (2004). A versatile toolbox for PCR-based tagging of yeast genes: new fluorescent proteins, more markers and promoter substitution cassettes. *Yeast* *21*, 947-962.

Kessler, M.M., Zhao, J., and Moore, C.L. (1996). Purification of the *Saccharomyces cerevisiae* cleavage/polyadenylation factor I. Separation into two components that are required for both cleavage and polyadenylation of mRNA 3' ends. *J Biol Chem* *271*, 27167-27175.

Libri, D., Graziani, N., Saguez, C., and Boulay, J. (2001). Multiple roles for the yeast SUB2/yUAP56 gene in splicing. *Genes Dev* *15*, 36-41.

Stutz, F., Bachi, A., Doerks, T., Braun, I.C., Seraphin, B., Wilm, M., Bork, P., and Izaurralde, E. (2000). REF, an evolutionary conserved family of hnRNP-like proteins, interacts with TAP/Mex67p and participates in mRNA nuclear export. *RNA* *6*, 638-650.

Wiegand, H.L., Lu, S., and Cullen, B.R. (2003). Exon junction complexes mediate the enhancing effect of splicing on mRNA expression. *Proc Natl Acad Sci USA* *100*, 11327-11332.
